# Supplementary material for: Interaction of 2-(2′-pyridyl)benzimidazolyl derivative ligands with group 12 metal ions: coordination, structures and luminescence
Source: Royal Society of Chemistry journal article supplement (doi:10.1039/b604047k), 2006-01-01
Supplement: b604047k.pdf [file b604047k.pdf]

# Supporting information

## **Interaction of 2-(2'-Pyridyl)benzimidazolyl Derivative Ligands with Group 12 Metal Ions: Coordination, Structures and Luminescence**

Louise de la Durantaye, Theresa M<sup>c</sup>Cormick, Xiang-Yang Liu, Su-ning Wang\*

Department of Chemistry, Queen's University, Kingston, Ontario, K7L 3N6 Canada

Figure S1: TGA diagram of 1

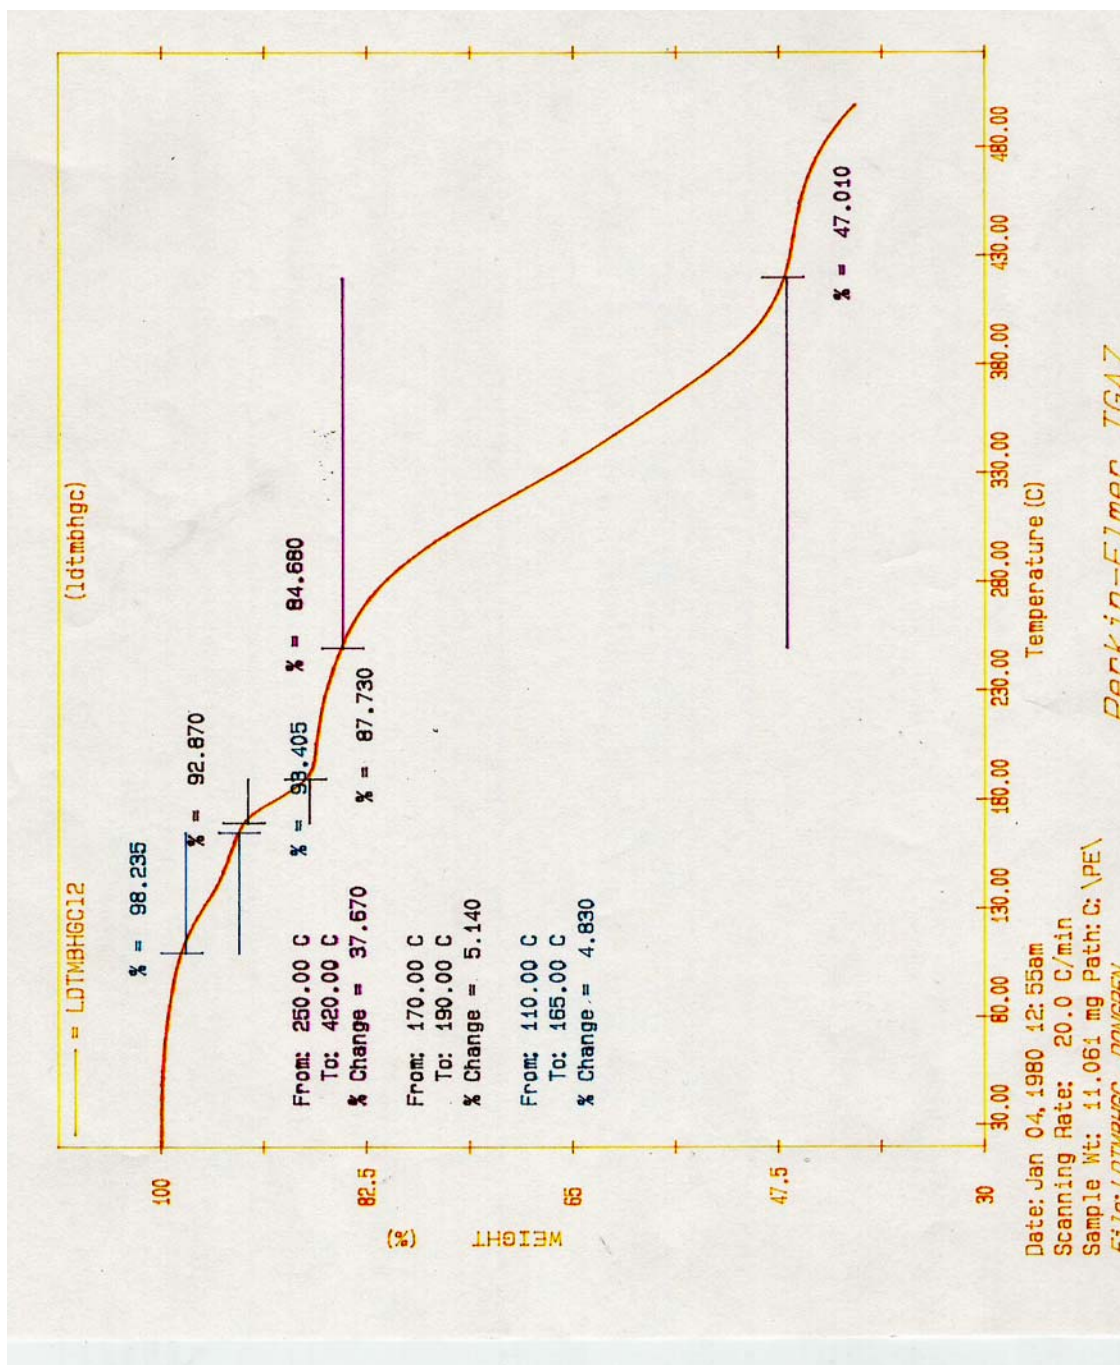

Figure S2. Titration diagram of mb (0.01 mM in THF) by  $\text{Cd}(\text{ClO}_4)_2$ .

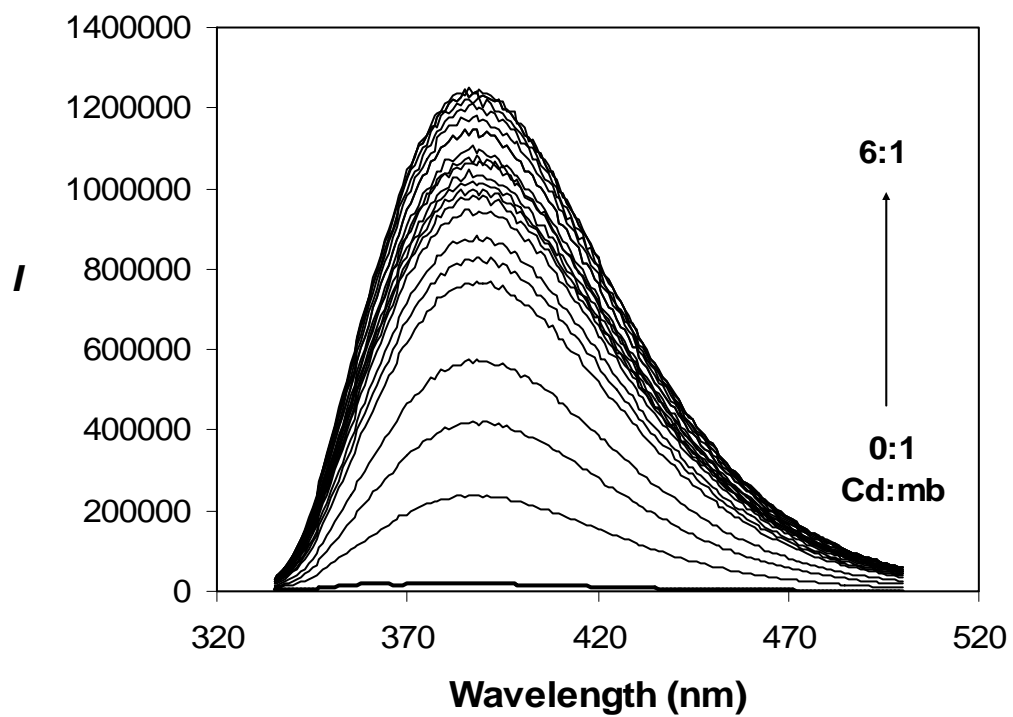

Figure S3. Titration diagram of tmb (0.01 mM in THF) by  $\text{Cd}(\text{ClO}_4)_2$

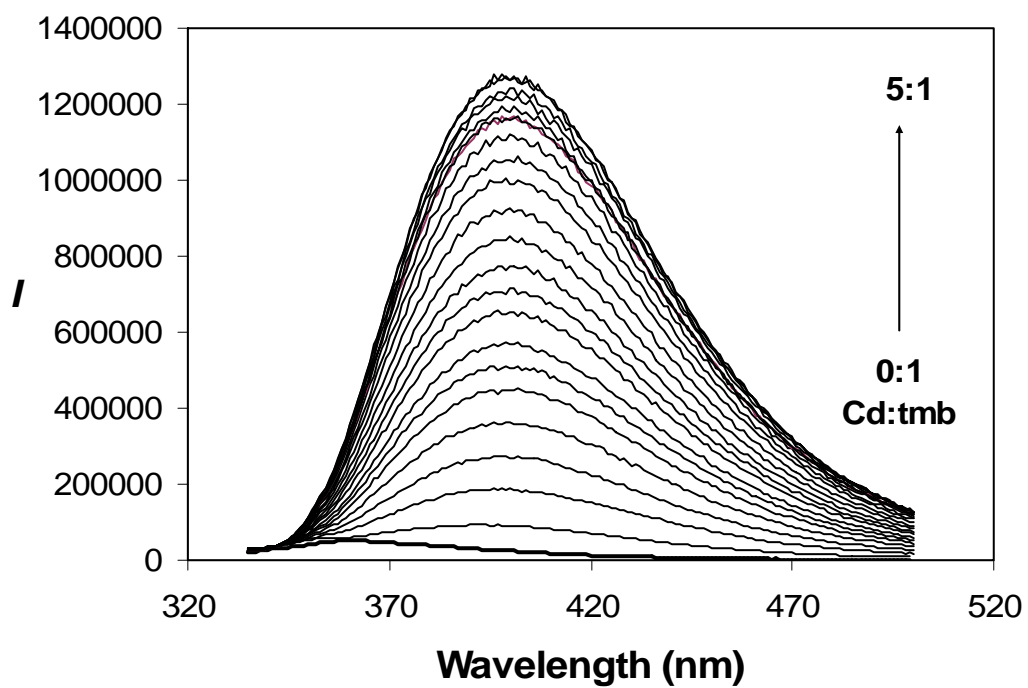

Figure S4. Titration diagram of tmb (0.01 mM in THF) by  $\text{Cd}(\text{OAc})_2$

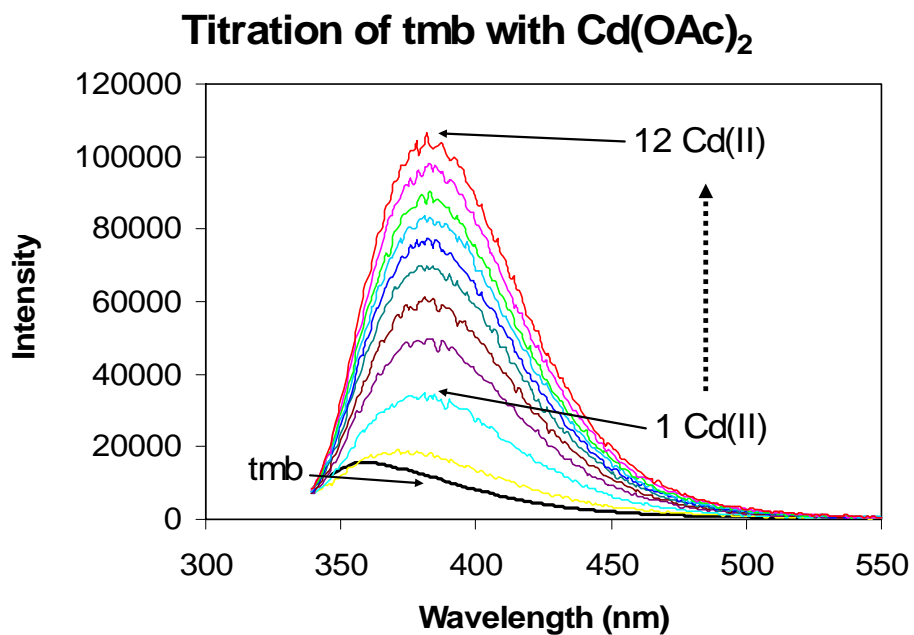

Figure S5. Titration diagram of tmb (0.01 mM in THF) by  $\text{Hg}(\text{ClO}_4)_2$

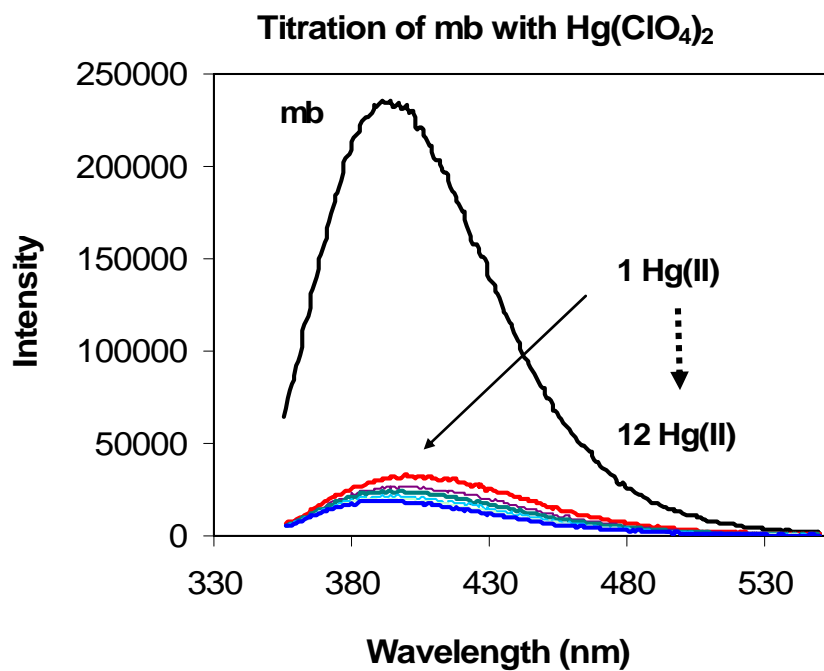

Figure S6. Titration diagram of tmb (0.01 mM in THF) by  $\text{HgCl}_2$ .

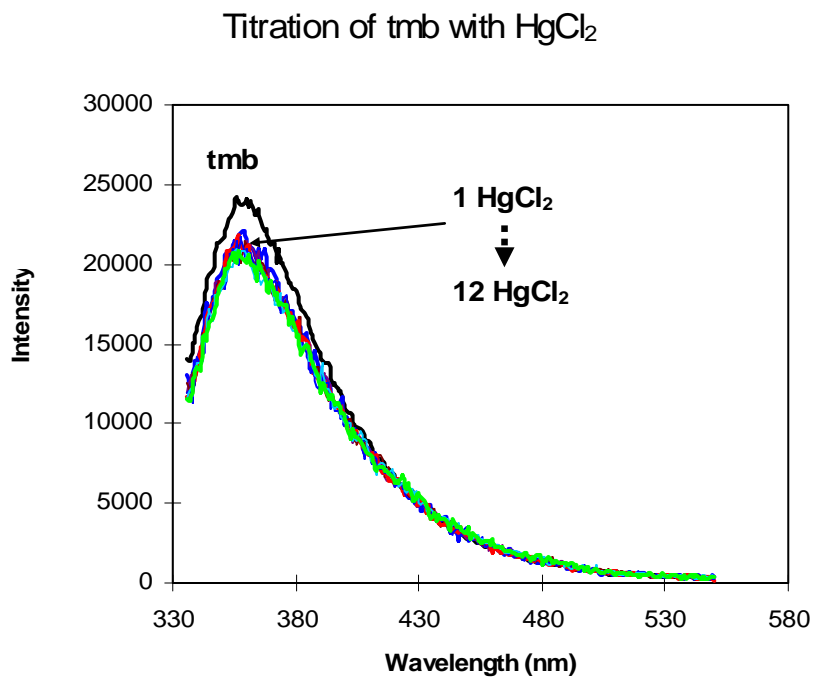

Figure S7. Stern-Volmer plots of titration of tmb (0.01 mM in THF) by  $\text{M}(\text{ClO}_4)_2$

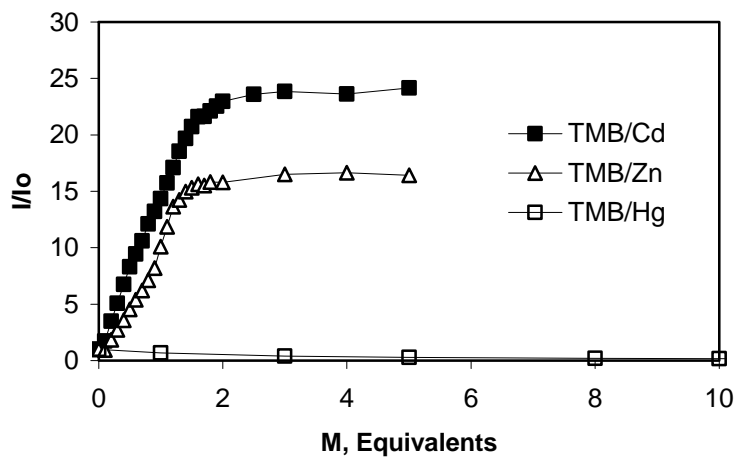

Figure S8. Stern-Volmer plots of titration of mb (0.01 mM in THF) by  $M(\text{ClO}_4)_2$

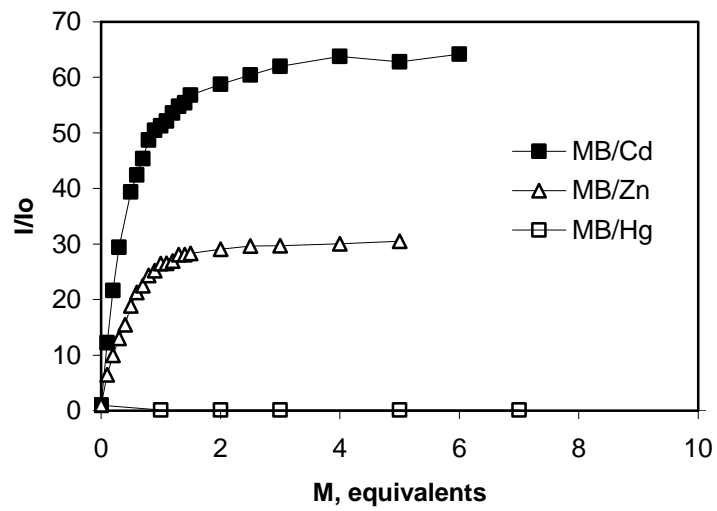

Fig. S9. The fluorescent intensity change of tmb and mb after the addition of 4 equivalents of metal perchlorates in THF (0.01 mM)

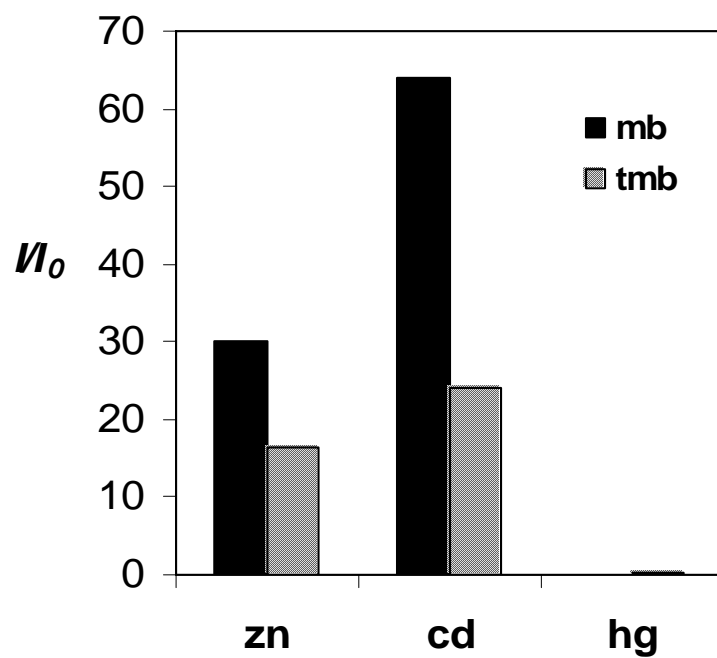



Figure S10. The  $^1\text{H}$  NMR spectra of the reaction of tmb with  $\text{Zn}(\text{O}_2\text{CCF}_3)_2$  in  $\text{CD}_2\text{Cl}_2$

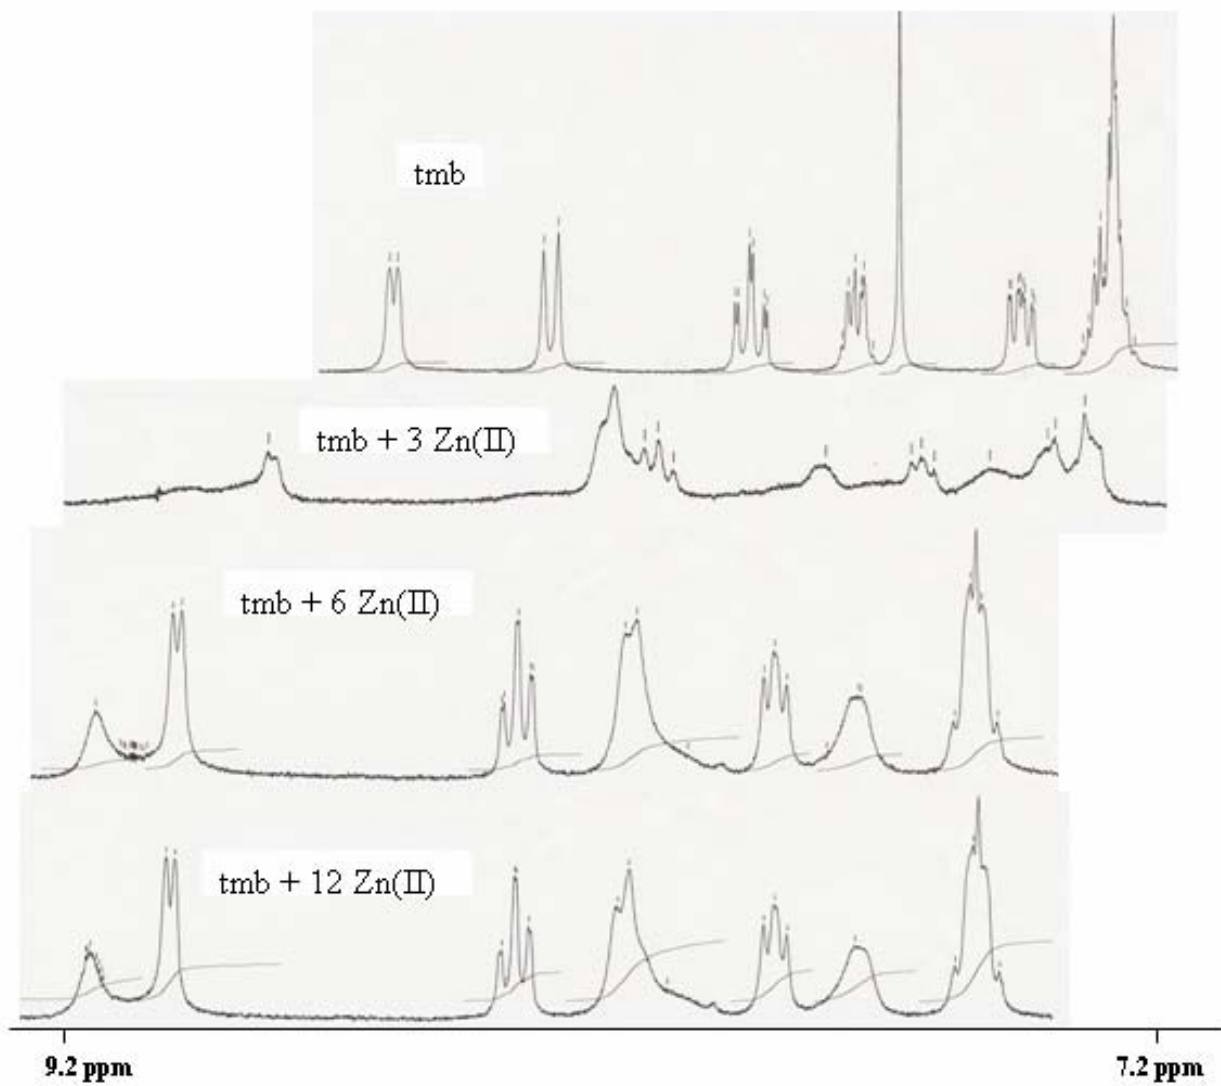

Figure S11. The Job's diagrams for MB and TMB with  $\text{Cd}(\text{ClO}_4)_2$ , respectively (recorded in THF).

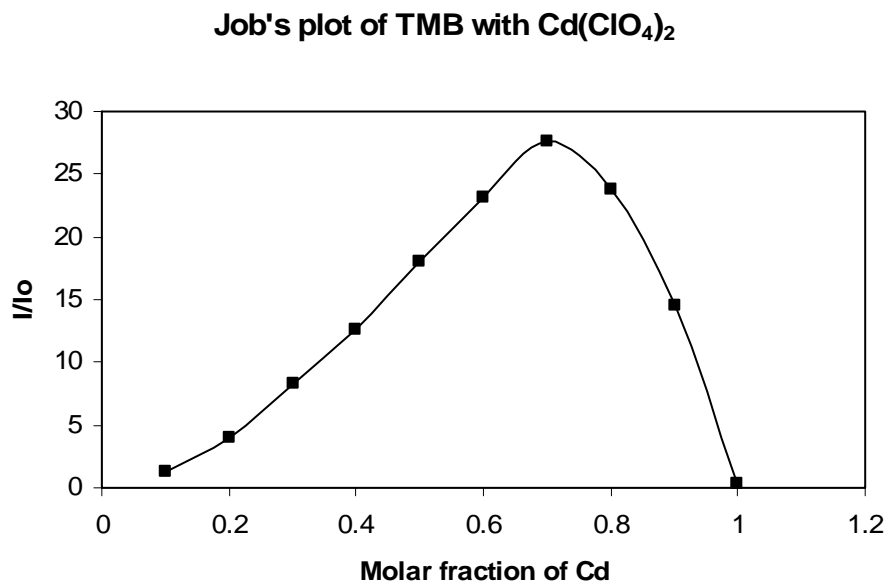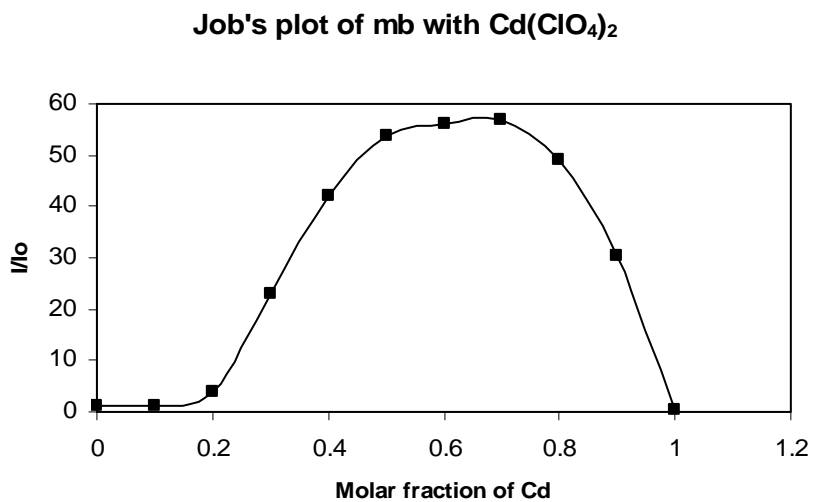

Figure S12. The Job's diagrams for MB and TMB with  $\text{Zn}(\text{ClO}_4)_2$ , respectively (recorded in THF).

**Job's plot of mb with  $\text{Zn}(\text{ClO}_4)_2$**

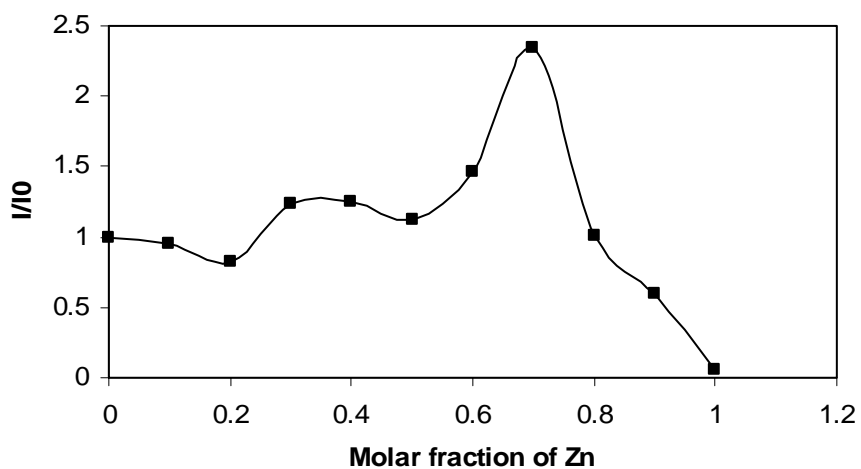

**Job's plot of tmb with  $\text{Zn}(\text{ClO}_4)_2$**

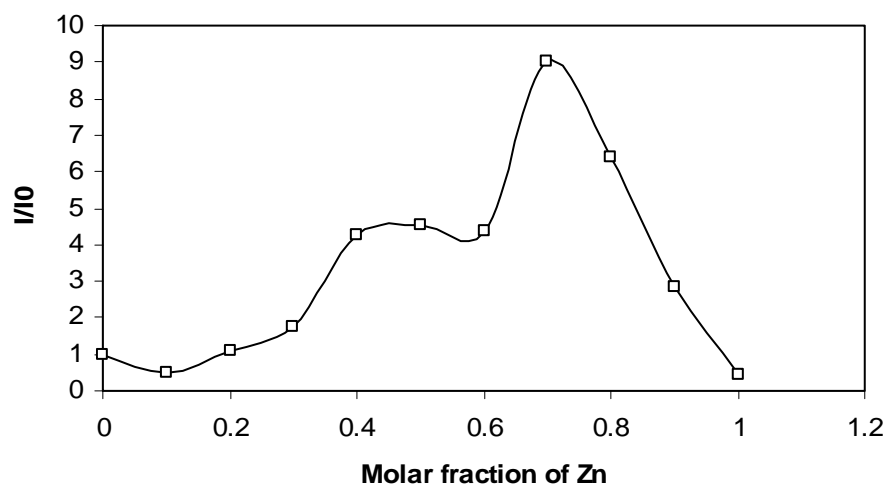

Table 1. Crystal data and structure refinement for 1

|                                   |                                                                                |                  |
|-----------------------------------|--------------------------------------------------------------------------------|------------------|
| Identification code               | 1                                                                              |                  |
| Empirical formula                 | C <sub>56</sub> H <sub>43</sub> Cl <sub>4</sub> Hg <sub>2</sub> N <sub>9</sub> |                  |
| Formula weight                    | 1384.97                                                                        |                  |
| Temperature                       | 295(2) K                                                                       |                  |
| Wavelength                        | 0.71073 Å                                                                      |                  |
| Crystal system                    | Triclinic                                                                      |                  |
| Space group                       | P-1                                                                            |                  |
| Unit cell dimensions              | a = 13.492(6) Å                                                                | α = 102.163(7)°. |
|                                   | b = 14.686(5) Å                                                                | β = 113.679(6)°. |
|                                   | c = 15.880(6) Å                                                                | γ = 103.799(8)°. |
| Volume                            | 2627.1(18) Å <sup>3</sup>                                                      |                  |
| Z                                 | 2                                                                              |                  |
| Density (calculated)              | 1.751 Mg/m <sup>3</sup>                                                        |                  |
| Absorption coefficient            | 6.087 mm <sup>-1</sup>                                                         |                  |
| F(000)                            | 1340                                                                           |                  |
| Crystal size                      | 0.40 x 0.20 x 0.10 mm <sup>3</sup>                                             |                  |
| Theta range for data collection   | 2.35 to 25.00°.                                                                |                  |
| Index ranges                      | -16 ≤ h ≤ 15, -17 ≤ k ≤ 16, -18 ≤ l ≤ 18                                       |                  |
| Reflections collected             | 12062                                                                          |                  |
| Independent reflections           | 8301 [R(int) = 0.0486]                                                         |                  |
| Completeness to theta = 25.00°    | 89.9 %                                                                         |                  |
| Absorption correction             | Empirical (Bruker SADABS)                                                      |                  |
| Max. and min. transmission        | 1.0000 and 0.6570                                                              |                  |
| Refinement method                 | Full-matrix least-squares on F <sup>2</sup>                                    |                  |
| Data / restraints / parameters    | 8301 / 0 / 479                                                                 |                  |
| Goodness-of-fit on F <sup>2</sup> | 0.779                                                                          |                  |
| Final R indices [I > 2σ(I)]       | R1 = 0.0671, wR2 = 0.1096                                                      |                  |
| R indices (all data)              | R1 = 0.1474, wR2 = 0.1151                                                      |                  |
| Largest diff. peak and hole       | 1.258 and -0.728 e.Å <sup>-3</sup>                                             |                  |

Table 2. Atomic coordinates ( $\times 10^4$ ) and equivalent isotropic displacement parameters ( $\text{\AA}^2 \times 10^3$ ) for 1.  $U(\text{eq})$  is defined as one third of the trace of the orthogonalized  $U^{ij}$  tensor.

|       | x         | y         | z        | U(eq)  |
|-------|-----------|-----------|----------|--------|
| Hg(1) | 839(1)    | 1961(1)   | 2928(1)  | 77(1)  |
| Hg(2) | 2555(1)   | -5655(1)  | 2680(1)  | 69(1)  |
| Cl(1) | 3034(3)   | -6562(3)  | 1615(3)  | 87(1)  |
| Cl(2) | 2489(4)   | -5718(3)  | 4121(3)  | 89(1)  |
| Cl(3) | -49(4)    | 2572(3)   | 1681(3)  | 94(1)  |
| Cl(4) | 846(3)    | 1820(3)   | 4354(3)  | 98(2)  |
| N(1)  | 4190(11)  | -4148(7)  | 3147(8)  | 65(4)  |
| N(4)  | 2312(10)  | 1496(8)   | 2732(7)  | 51(3)  |
| N(5)  | 2938(10)  | 378(8)    | 2167(7)  | 48(3)  |
| N(6)  | 74(13)    | 217(8)    | 1742(9)  | 68(4)  |
| N(7)  | 4401(12)  | -1510(9)  | 398(9)   | 49(3)  |
| N(8)  | 5784(11)  | -1159(10) | 20(12)   | 67(4)  |
| C(1)  | 5293(16)  | -4006(13) | 3669(11) | 86(6)  |
| C(2)  | 6200(15)  | -3141(14) | 3908(11) | 90(6)  |
| C(3)  | 5953(13)  | -2383(13) | 3686(12) | 119(8) |
| C(4)  | 4797(14)  | -2513(11) | 3144(10) | 70(5)  |
| C(5)  | 3907(12)  | -3416(11) | 2831(9)  | 50(4)  |
| C(6)  | 2682(7)   | -3625(6)  | 2268(6)  | 60(4)  |
| N(3)  | 1884(8)   | -4430(6)  | 2206(6)  | 39(3)  |
| C(7)  | 821(8)    | -4425(6)  | 1653(7)  | 53(4)  |
| C(12) | 962(8)    | -3617(7)  | 1374(7)  | 60(5)  |
| N(2)  | 2112(9)   | -3122(5)  | 1754(6)  | 47(3)  |
| C(8)  | -254(13)  | -5064(10) | 1354(11) | 72(5)  |
| C(9)  | -1178(13) | -4849(11) | 805(10)  | 83(5)  |
| C(10) | -1053(14) | -4030(13) | 467(11)  | 97(6)  |
| C(11) | 58(16)    | -3376(12) | 802(11)  | 95(6)  |
| C(13) | -1038(14) | -343(12)  | 1162(12) | 73(5)  |
| C(14) | -1473(15) | -1074(12) | 361(13)  | 77(6)  |
| C(15) | -729(18)  | -1309(11) | 58(10)   | 75(6)  |
| C(16) | 446(13)   | -741(10)  | 624(11)  | 44(4)  |
| C(17) | 760(12)   | -65(10)   | 1460(11) | 41(4)  |

|       |          |           |           |        |
|-------|----------|-----------|-----------|--------|
| C(18) | 1981(15) | 585(10)   | 2107(10)  | 50(4)  |
| C(19) | 3560(12) | 1932(11)  | 3283(11)  | 59(5)  |
| C(20) | 4261(16) | 2813(11)  | 3928(11)  | 70(5)  |
| C(21) | 5423(16) | 3010(11)  | 4279(10)  | 76(5)  |
| C(22) | 5771(13) | 2288(13)  | 3925(11)  | 77(5)  |
| C(23) | 5108(13) | 1385(11)  | 3237(10)  | 64(4)  |
| C(24) | 3902(13) | 1186(11)  | 2850(10)  | 51(4)  |
| N(9)  | 6281(9)  | -439(7)   | 2402(11)  | 72(4)  |
| C(25) | 7040(12) | 197(11)   | 3328(9)   | 110(7) |
| C(26) | 7791(9)  | 1088(10)  | 3479(7)   | 87(6)  |
| C(27) | 7782(8)  | 1345(6)   | 2705(11)  | 79(5)  |
| C(28) | 7022(9)  | 709(8)    | 1780(9)   | 62(4)  |
| C(29) | 6272(7)  | -183(7)   | 1628(8)   | 54(4)  |
| C(30) | 5490(15) | -904(11)  | 691(14)   | 60(5)  |
| C(31) | 2900(13) | -2973(13) | -1142(14) | 70(5)  |
| C(32) | 2754(17) | -3515(14) | -2027(15) | 94(6)  |
| C(33) | 3660(20) | -3292(15) | -2257(13) | 91(6)  |
| C(34) | 4711(19) | -2553(15) | -1640(15) | 80(5)  |
| C(35) | 4837(16) | -1987(13) | -770(14)  | 57(4)  |
| C(36) | 3942(16) | -2224(11) | -527(12)  | 54(4)  |
| C(37) | 2637(7)  | -2254(6)  | 1593(6)   | 47(4)  |
| C(38) | 2502(7)  | -1364(7)  | 1937(6)   | 54(4)  |
| C(39) | 2983(7)  | -523(6)   | 1760(6)   | 46(4)  |
| C(40) | 3599(7)  | -573(6)   | 1240(6)   | 50(4)  |
| C(41) | 3734(7)  | -1463(7)  | 896(6)    | 51(4)  |
| C(42) | 3253(7)  | -2304(6)  | 1073(6)   | 37(3)  |

---

Table 3. Bond lengths [ $\text{\AA}$ ] and angles [ $^\circ$ ] for 1.

|             |           |             |           |
|-------------|-----------|-------------|-----------|
| Hg(1)-Cl(4) | 2.312(4)  | N(2)-C(37)  | 1.430(9)  |
| Hg(1)-Cl(3) | 2.350(4)  | C(8)-C(9)   | 1.358(16) |
| Hg(1)-N(4)  | 2.360(11) | C(9)-C(10)  | 1.418(17) |
| Hg(1)-N(6)  | 2.514(11) | C(10)-C(11) | 1.382(18) |
| Hg(2)-Cl(1) | 2.323(4)  | C(13)-C(14) | 1.281(17) |
| Hg(2)-N(3)  | 2.328(7)  | C(14)-C(15) | 1.357(19) |
| Hg(2)-Cl(2) | 2.345(4)  | C(15)-C(16) | 1.387(18) |
| Hg(2)-N(1)  | 2.445(11) | C(16)-C(17) | 1.311(15) |
| N(1)-C(1)   | 1.317(16) | C(17)-C(18) | 1.469(18) |
| N(1)-C(5)   | 1.351(14) | C(19)-C(20) | 1.303(17) |
| N(4)-C(18)  | 1.332(14) | C(19)-C(24) | 1.436(18) |
| N(4)-C(19)  | 1.441(14) | C(20)-C(21) | 1.367(18) |
| N(5)-C(24)  | 1.365(14) | C(21)-C(22) | 1.363(19) |
| N(5)-C(18)  | 1.368(15) | C(22)-C(23) | 1.339(17) |
| N(5)-C(39)  | 1.372(11) | C(23)-C(24) | 1.416(17) |
| N(6)-C(17)  | 1.290(15) | N(9)-C(29)  | 1.355(5)  |
| N(6)-C(13)  | 1.326(16) | N(9)-C(25)  | 1.355(5)  |
| N(7)-C(30)  | 1.348(16) | C(25)-C(26) | 1.356(5)  |
| N(7)-C(36)  | 1.397(15) | C(26)-C(27) | 1.355(5)  |
| N(7)-C(41)  | 1.421(12) | C(27)-C(28) | 1.355(5)  |
| N(8)-C(30)  | 1.295(16) | C(28)-C(29) | 1.355(5)  |
| N(8)-C(35)  | 1.419(18) | C(29)-C(30) | 1.411(18) |
| C(1)-C(2)   | 1.391(18) | C(31)-C(36) | 1.360(18) |
| C(2)-C(3)   | 1.313(18) | C(31)-C(32) | 1.371(19) |
| C(3)-C(4)   | 1.386(17) | C(32)-C(33) | 1.40(2)   |
| C(4)-C(5)   | 1.389(16) | C(33)-C(34) | 1.36(2)   |
| C(5)-C(6)   | 1.442(14) | C(34)-C(35) | 1.373(19) |
| C(6)-N(2)   | 1.350(5)  | C(35)-C(36) | 1.400(18) |
| C(6)-N(3)   | 1.350(5)  | C(37)-C(38) | 1.390(5)  |
| N(3)-C(7)   | 1.350(5)  | C(37)-C(42) | 1.391(5)  |
| C(7)-C(8)   | 1.350(14) | C(38)-C(39) | 1.391(5)  |
| C(7)-C(12)  | 1.350(5)  | C(39)-C(40) | 1.391(5)  |
| C(12)-N(2)  | 1.350(5)  | C(40)-C(41) | 1.391(5)  |
| C(12)-C(11) | 1.374(16) | C(41)-C(42) | 1.391(5)  |

|                   |            |                   |           |
|-------------------|------------|-------------------|-----------|
|                   |            | N(2)-C(6)-N(3)    | 108.0     |
| Cl(4)-Hg(1)-Cl(3) | 139.98(16) | N(2)-C(6)-C(5)    | 131.0(9)  |
| Cl(4)-Hg(1)-N(4)  | 110.8(2)   | N(3)-C(6)-C(5)    | 121.0(9)  |
| Cl(3)-Hg(1)-N(4)  | 108.8(2)   | C(7)-N(3)-C(6)    | 108.0     |
| Cl(4)-Hg(1)-N(6)  | 107.1(3)   | C(7)-N(3)-Hg(2)   | 133.7(5)  |
| Cl(3)-Hg(1)-N(6)  | 92.7(3)    | C(6)-N(3)-Hg(2)   | 116.1(5)  |
| N(4)-Hg(1)-N(6)   | 67.5(4)    | C(8)-C(7)-C(12)   | 120.2(9)  |
| Cl(1)-Hg(2)-N(3)  | 114.7(2)   | C(8)-C(7)-N(3)    | 131.7(9)  |
| Cl(1)-Hg(2)-Cl(2) | 135.16(14) | C(12)-C(7)-N(3)   | 108.0     |
| N(3)-Hg(2)-Cl(2)  | 110.0(2)   | C(7)-C(12)-N(2)   | 108.0     |
| Cl(1)-Hg(2)-N(1)  | 91.2(3)    | C(7)-C(12)-C(11)  | 123.8(10) |
| N(3)-Hg(2)-N(1)   | 69.8(4)    | N(2)-C(12)-C(11)  | 128.2(10) |
| Cl(2)-Hg(2)-N(1)  | 106.8(3)   | C(6)-N(2)-C(12)   | 108.0     |
| C(1)-N(1)-C(5)    | 118.9(12)  | C(6)-N(2)-C(37)   | 125.7(8)  |
| C(1)-N(1)-Hg(2)   | 125.5(10)  | C(12)-N(2)-C(37)  | 126.2(8)  |
| C(5)-N(1)-Hg(2)   | 115.6(10)  | C(7)-C(8)-C(9)    | 118.3(12) |
| C(18)-N(4)-C(19)  | 110.2(13)  | C(8)-C(9)-C(10)   | 122.3(15) |
| C(18)-N(4)-Hg(1)  | 116.5(10)  | C(11)-C(10)-C(9)  | 117.9(14) |
| C(19)-N(4)-Hg(1)  | 132.3(10)  | C(12)-C(11)-C(10) | 117.1(13) |
| C(24)-N(5)-C(18)  | 108.2(12)  | C(14)-C(13)-N(6)  | 127.1(17) |
| C(24)-N(5)-C(39)  | 123.1(12)  | C(13)-C(14)-C(15) | 117.4(17) |
| C(18)-N(5)-C(39)  | 127.8(12)  | C(14)-C(15)-C(16) | 118.4(15) |
| C(17)-N(6)-C(13)  | 113.7(13)  | C(17)-C(16)-C(15) | 116.6(14) |
| C(17)-N(6)-Hg(1)  | 118.0(11)  | N(6)-C(17)-C(16)  | 126.1(13) |
| C(13)-N(6)-Hg(1)  | 125.4(12)  | N(6)-C(17)-C(18)  | 112.1(15) |
| C(30)-N(7)-C(36)  | 110.7(14)  | C(16)-C(17)-C(18) | 120.9(16) |
| C(30)-N(7)-C(41)  | 127.9(14)  | N(4)-C(18)-N(5)   | 109.6(14) |
| C(36)-N(7)-C(41)  | 121.3(14)  | N(4)-C(18)-C(17)  | 123.4(14) |
| C(30)-N(8)-C(35)  | 108.0(15)  | N(5)-C(18)-C(17)  | 127.1(14) |
| N(1)-C(1)-C(2)    | 123.8(14)  | C(20)-C(19)-C(24) | 125.5(15) |
| C(3)-C(2)-C(1)    | 118.7(16)  | C(20)-C(19)-N(4)  | 131.7(17) |
| C(2)-C(3)-C(4)    | 118.2(15)  | C(24)-C(19)-N(4)  | 102.3(12) |
| C(3)-C(4)-C(5)    | 122.0(13)  | C(19)-C(20)-C(21) | 116.9(15) |
| N(1)-C(5)-C(4)    | 117.8(12)  | C(22)-C(21)-C(20) | 118.5(14) |
| N(1)-C(5)-C(6)    | 115.7(12)  | C(23)-C(22)-C(21) | 128.1(16) |
| C(4)-C(5)-C(6)    | 126.2(12)  | C(22)-C(23)-C(24) | 113.7(14) |



|                   |           |                   |           |
|-------------------|-----------|-------------------|-----------|
| N(5)-C(24)-C(23)  | 133.4(15) | C(34)-C(35)-C(36) | 120.3(18) |
| N(5)-C(24)-C(19)  | 109.6(13) | C(34)-C(35)-N(8)  | 131.5(19) |
| C(23)-C(24)-C(19) | 116.9(13) | C(36)-C(35)-N(8)  | 108.2(16) |
| C(29)-N(9)-C(25)  | 120.0     | C(31)-C(36)-N(7)  | 134(2)    |
| N(9)-C(25)-C(26)  | 120.0     | C(31)-C(36)-C(35) | 122.9(17) |
| C(27)-C(26)-C(25) | 120.0     | N(7)-C(36)-C(35)  | 103.2(16) |
| C(28)-C(27)-C(26) | 120.0     | C(38)-C(37)-C(42) | 120.0     |
| C(27)-C(28)-C(29) | 120.0     | C(38)-C(37)-N(2)  | 119.6(7)  |
| N(9)-C(29)-C(28)  | 120.0     | C(42)-C(37)-N(2)  | 120.3(7)  |
| N(9)-C(29)-C(30)  | 116.4(11) | C(37)-C(38)-C(39) | 120.0     |
| C(28)-C(29)-C(30) | 123.5(12) | N(5)-C(39)-C(38)  | 120.3(8)  |
| N(8)-C(30)-N(7)   | 109.8(16) | N(5)-C(39)-C(40)  | 119.5(9)  |
| N(8)-C(30)-C(29)  | 123.2(17) | C(38)-C(39)-C(40) | 120.0     |
| N(7)-C(30)-C(29)  | 126.5(17) | C(41)-C(40)-C(39) | 120.0     |
| C(36)-C(31)-C(32) | 117.0(16) | C(42)-C(41)-C(40) | 120.0     |
| C(31)-C(32)-C(33) | 120.0(18) | C(42)-C(41)-N(7)  | 119.6(8)  |
| C(34)-C(33)-C(32) | 123.4(19) | C(40)-C(41)-N(7)  | 120.4(8)  |
| C(33)-C(34)-C(35) | 116.4(18) | C(37)-C(42)-C(41) | 120.0     |

---

Symmetry transformations used to generate equivalent atoms:

Table 4. Anisotropic displacement parameters ( $\text{\AA}^2 \times 10^3$ ) for 1. The anisotropic displacement factor exponent takes the form:  $-2\pi^2 [ h^2 a^{*2} U^{11} + \dots + 2 h k a^* b^* U^{12} ]$

|       | $U^{11}$ | $U^{22}$ | $U^{33}$ | $U^{23}$ | $U^{13}$ | $U^{12}$ |
|-------|----------|----------|----------|----------|----------|----------|
| Hg(1) | 88(1)    | 68(1)    | 82(1)    | 24(1)    | 42(1)    | 38(1)    |
| Hg(2) | 65(1)    | 55(1)    | 79(1)    | 28(1)    | 26(1)    | 19(1)    |
| Cl(1) | 70(3)    | 93(3)    | 75(3)    | 13(2)    | 21(2)    | 34(2)    |
| Cl(2) | 110(4)   | 77(3)    | 77(3)    | 30(2)    | 42(3)    | 30(3)    |
| Cl(3) | 103(4)   | 93(3)    | 111(3)   | 45(3)    | 55(3)    | 59(3)    |
| Cl(4) | 63(3)    | 117(4)   | 81(3)    | 27(3)    | 24(3)    | 4(3)     |
| N(1)  | 59(10)   | 50(7)    | 83(9)    | 42(7)    | 25(8)    | 13(7)    |
| N(4)  | 75(10)   | 37(7)    | 35(7)    | 16(6)    | 18(7)    | 24(7)    |
| N(5)  | 49(9)    | 34(7)    | 55(8)    | 8(6)     | 20(7)    | 18(7)    |
| N(6)  | 52(10)   | 53(8)    | 75(10)   | -1(7)    | 20(9)    | 18(8)    |

|       |         |         |         |        |         |         |
|-------|---------|---------|---------|--------|---------|---------|
| N(7)  | 47(10)  | 63(8)   | 61(9)   | 24(7)  | 45(8)   | 25(8)   |
| N(8)  | 54(10)  | 73(10)  | 93(11)  | 39(9)  | 46(10)  | 24(9)   |
| C(1)  | 55(12)  | 91(13)  | 101(14) | 46(11) | 14(11)  | 38(11)  |
| C(2)  | 65(14)  | 98(14)  | 87(13)  | 42(12) | 12(10)  | 31(13)  |
| C(3)  | 35(12)  | 87(14)  | 124(16) | 29(12) | -37(11) | -19(10) |
| C(4)  | 56(12)  | 63(11)  | 87(12)  | 41(9)  | 16(10)  | 33(10)  |
| C(5)  | 42(11)  | 63(10)  | 53(10)  | 30(8)  | 26(8)   | 15(9)   |
| C(6)  | 48(12)  | 69(11)  | 90(12)  | 43(9)  | 48(10)  | 23(10)  |
| N(3)  | 14(6)   | 41(6)   | 56(7)   | 13(5)  | 13(6)   | 10(5)   |
| C(7)  | 61(12)  | 37(8)   | 80(11)  | 47(8)  | 37(10)  | 21(8)   |
| C(12) | 6(9)    | 56(9)   | 81(11)  | 28(9)  | -7(8)   | -8(8)   |
| N(2)  | 57(9)   | 26(6)   | 69(8)   | 27(6)  | 32(7)   | 21(6)   |
| C(8)  | 47(11)  | 68(10)  | 118(14) | 57(10) | 44(10)  | 19(9)   |
| C(9)  | 48(12)  | 74(12)  | 86(13)  | 29(10) | 6(10)   | -1(9)   |
| C(10) | 48(12)  | 99(14)  | 114(14) | 62(12) | 10(11)  | 7(11)   |
| C(11) | 90(15)  | 82(12)  | 119(15) | 64(11) | 42(12)  | 28(12)  |
| C(13) | 50(12)  | 55(10)  | 80(13)  | 3(10)  | 8(10)   | 20(9)   |
| C(14) | 67(14)  | 39(10)  | 112(16) | -5(10) | 49(12)  | 13(10)  |
| C(15) | 118(18) | 65(12)  | 31(10)  | 11(9)  | 20(12)  | 48(13)  |
| C(16) | 33(11)  | 47(9)   | 53(11)  | 17(8)  | 19(9)   | 17(8)   |
| C(17) | 22(10)  | 31(8)   | 41(10)  | -4(8)  | 2(8)    | 3(8)    |
| C(18) | 94(14)  | 51(10)  | 62(11)  | 44(9)  | 60(11)  | 58(11)  |
| C(19) | 17(10)  | 43(9)   | 96(13)  | 38(9)  | 14(10)  | -11(8)  |
| C(20) | 75(14)  | 46(10)  | 75(12)  | 1(9)   | 35(11)  | 15(10)  |
| C(21) | 77(15)  | 47(11)  | 50(11)  | -14(8) | 10(11)  | -3(10)  |
| C(22) | 50(12)  | 77(12)  | 46(11)  | 7(10)  | -5(9)   | -9(11)  |
| C(23) | 39(11)  | 83(12)  | 43(10)  | 4(9)   | 5(8)    | 21(9)   |
| C(24) | 44(12)  | 43(9)   | 60(11)  | 16(8)  | 22(9)   | 14(9)   |
| N(9)  | 67(10)  | 106(11) | 77(10)  | 58(9)  | 51(9)   | 30(9)   |
| C(25) | 48(13)  | 150(18) | 95(17)  | 67(14) | 12(12)  | -9(12)  |
| C(26) | 55(13)  | 139(18) | 75(13)  | 52(12) | 33(10)  | 31(13)  |
| C(27) | 37(11)  | 48(10)  | 105(14) | -4(11) | 20(11)  | -9(8)   |
| C(28) | 28(9)   | 57(9)   | 114(14) | 42(10) | 36(10)  | 20(8)   |
| C(29) | 9(9)    | 49(10)  | 83(13)  | -1(10) | 14(9)   | 12(8)   |
| C(30) | 34(12)  | 51(10)  | 137(18) | 52(12) | 67(13)  | 20(9)   |
| C(31) | 36(12)  | 72(12)  | 91(14)  | 34(11) | 32(12)  | -4(10)  |

|       |         |         |        |        |        |        |
|-------|---------|---------|--------|--------|--------|--------|
| C(32) | 68(15)  | 109(16) | 94(17) | 21(13) | 46(14) | 11(12) |
| C(33) | 99(18)  | 102(16) | 85(15) | 42(13) | 45(15) | 47(15) |
| C(34) | 104(19) | 96(14)  | 89(15) | 38(12) | 83(14) | 46(14) |
| C(35) | 58(14)  | 80(13)  | 83(15) | 60(12) | 59(13) | 32(11) |
| C(36) | 75(14)  | 48(10)  | 59(13) | 33(10) | 39(12) | 29(10) |
| C(37) | 32(9)   | 60(10)  | 53(9)  | 23(8)  | 17(7)  | 25(8)  |
| C(39) | 20(9)   | 55(9)   | 42(9)  | 20(8)  | -1(7)  | 1(7)   |
| C(40) | 47(11)  | 66(11)  | 54(10) | 49(8)  | 20(8)  | 28(8)  |
| C(41) | 24(9)   | 41(9)   | 71(11) | 29(8)  | 12(8)  | -4(7)  |
| C(42) | 31(9)   | 40(8)   | 49(9)  | 16(7)  | 26(7)  | 16(7)  |

---

Table 5. Hydrogen coordinates ( $\times 10^4$ ) and isotropic displacement parameters ( $\text{\AA}^2 \times 10^3$ ) for 1.

|        | x     | y     | z     | U(eq) |
|--------|-------|-------|-------|-------|
| H(1A)  | 5476  | -4512 | 3890  | 103   |
| H(2A)  | 6966  | -3101 | 4220  | 108   |
| H(3A)  | 6539  | -1775 | 3886  | 143   |
| H(4A)  | 4611  | -1980 | 2986  | 84    |
| H(8A)  | -360  | -5638 | 1520  | 87    |
| H(9A)  | -1919 | -5254 | 644   | 100   |
| H(10A) | -1697 | -3936 | 35    | 117   |
| H(11A) | 189   | -2798 | 647   | 114   |
| H(13A) | -1558 | -189  | 1359  | 88    |
| H(14A) | -2269 | -1430 | 0     | 92    |
| H(15A) | -1000 | -1838 | -515  | 90    |
| H(16A) | 982   | -835  | 420   | 53    |
| H(20A) | 3983  | 3286  | 4141  | 84    |
| H(21A) | 5965  | 3622  | 4750  | 91    |
| H(22A) | 6568  | 2443  | 4195  | 92    |
| H(23A) | 5411  | 930   | 3032  | 76    |
| H(25A) | 7046  | 21    | 3859  | 132   |
| H(26A) | 8312  | 1524  | 4114  | 104   |
| H(27A) | 8297  | 1956  | 2809  | 94    |
| H(28A) | 7016  | 885   | 1249  | 75    |
| H(31A) | 2312  | -3111 | -970  | 84    |
| H(32A) | 2053  | -4032 | -2474 | 113   |
| H(33A) | 3537  | -3668 | -2864 | 109   |
| H(34A) | 5312  | -2438 | -1798 | 96    |
| H(38A) | 2090  | -1330 | 2284  | 65    |
| H(40A) | 3921  | -11   | 1122  | 61    |
| H(42A) | 3343  | -2899 | 843   | 44    |

Table 1. Crystal data and structure refinement for 2.

|                                   |                                                                                  |          |
|-----------------------------------|----------------------------------------------------------------------------------|----------|
| Identification code               | 2                                                                                |          |
| Empirical formula                 | C <sub>36</sub> H <sub>28</sub> Cl <sub>2</sub> N <sub>6</sub> O <sub>9</sub> Zn |          |
| Formula weight                    | 824.91                                                                           |          |
| Temperature                       | 296(2) K                                                                         |          |
| Wavelength                        | 0.71073 Å                                                                        |          |
| Crystal system                    | Orthorhombic                                                                     |          |
| Space group                       | Pccn                                                                             |          |
| Unit cell dimensions              | a = 27.83(5) Å                                                                   | α = 90°. |
|                                   | b = 9.917(16) Å                                                                  | β = 90°. |
|                                   | c = 13.27(2) Å                                                                   | γ = 90°. |
| Volume                            | 3664(10) Å <sup>3</sup>                                                          |          |
| Z                                 | 4                                                                                |          |
| Density (calculated)              | 1.495 Mg/m <sup>3</sup>                                                          |          |
| Absorption coefficient            | 0.880 mm <sup>-1</sup>                                                           |          |
| F(000)                            | 1688                                                                             |          |
| Crystal size                      | 0.05 x .3 x .5 mm <sup>3</sup>                                                   |          |
| Theta range for data collection   | 1.46 to 28.25°.                                                                  |          |
| Index ranges                      | -36 ≤ h ≤ 36, -12 ≤ k ≤ 12, -16 ≤ l ≤ 17                                         |          |
| Reflections collected             | 20604                                                                            |          |
| Independent reflections           | 4347 [R(int) = 0.1988]                                                           |          |
| Completeness to theta = 28.25°    | 95.9 %                                                                           |          |
| Absorption correction             | SADABS                                                                           |          |
| Max. and min. transmission        | 1.000 and 0.809                                                                  |          |
| Refinement method                 | Full-matrix least-squares on F <sup>2</sup>                                      |          |
| Data / restraints / parameters    | 4347 / 0 / 246                                                                   |          |
| Goodness-of-fit on F <sup>2</sup> | 1.068                                                                            |          |
| Final R indices [I > 2σ(I)]       | R1 = 0.1321, wR2 = 0.3340                                                        |          |
| R indices (all data)              | R1 = 0.2978, wR2 = 0.4184                                                        |          |
| Largest diff. peak and hole       | 1.070 and -0.956 e.Å <sup>-3</sup>                                               |          |

Table 2. Atomic coordinates ( $\times 10^4$ ) and equivalent isotropic displacement parameters ( $\text{\AA}^2 \times 10^3$ ) for 2.  $U(\text{eq})$  is defined as one third of the trace of the orthogonalized  $U^{ij}$  tensor.

|       | x       | y         | z        | $U(\text{eq})$ |
|-------|---------|-----------|----------|----------------|
| Cl(1) | 6558(1) | 265(4)    | 6125(3)  | 62(1)          |
| Zn(1) | 7500    | 2500      | 3997(2)  | 70(1)          |
| N(1)  | 6848(4) | 3365(13)  | 3969(8)  | 69(3)          |
| N(2)  | 6069(4) | 3103(11)  | 3727(8)  | 67(3)          |
| N(3)  | 7083(4) | 965(12)   | 3216(8)  | 69(3)          |
| C(1)  | 6124(5) | 4383(15)  | 4164(10) | 72(4)          |
| C(2)  | 5831(7) | 5415(17)  | 4408(12) | 99(6)          |
| C(3)  | 6044(9) | 6540(20)  | 4736(17) | 132(8)         |
| C(4)  | 6516(9) | 6660(20)  | 4873(15) | 123(7)         |
| C(5)  | 6851(6) | 5669(13)  | 4684(11) | 79(4)          |
| C(6)  | 6637(6) | 4420(16)  | 4288(9)  | 75(4)          |
| C(7)  | 6506(4) | 2483(14)  | 3642(8)  | 56(3)          |
| C(8)  | 6623(5) | 1207(13)  | 3222(9)  | 59(3)          |
| C(9)  | 6299(5) | 283(15)   | 2861(12) | 81(4)          |
| C(10) | 6464(6) | -940(18)  | 2489(12) | 97(5)          |
| C(11) | 6958(6) | -1218(18) | 2451(12) | 96(5)          |
| C(12) | 7257(5) | -165(13)  | 2839(11) | 71(4)          |
| C(13) | 5609(5) | 2560(17)  | 3424(12) | 86(4)          |
| C(14) | 5347(5) | 1820(16)  | 4105(11) | 79(4)          |
| C(15) | 4899(5) | 1377(18)  | 3847(15) | 106(6)         |
| C(16) | 4702(5) | 1767(17)  | 2949(17) | 96(6)          |
| C(17) | 4971(7) | 2500(20)  | 2327(16) | 123(7)         |
| C(18) | 5425(5) | 2894(18)  | 2511(11) | 94(6)          |
| O(1)  | 6660(4) | 1580(11)  | 6433(10) | 129(5)         |
| O(2)  | 6136(4) | 172(15)   | 5572(11) | 142(5)         |
| O(3)  | 6488(5) | -553(14)  | 6945(9)  | 131(5)         |
| O(4)  | 6933(4) | -137(11)  | 5532(11) | 128(5)         |
| O(5)  | 7500    | 2500      | 5547(10) | 89(4)          |

Table 3. Bond lengths [ $\text{\AA}$ ] and angles [ $^\circ$ ] for 2.

|                 |           |                   |           |
|-----------------|-----------|-------------------|-----------|
| Cl(1)-O(4)      | 1.366(10) | O(3)-Cl(1)-O(1)   | 110.4(8)  |
| Cl(1)-O(3)      | 1.372(11) | O(4)-Cl(1)-O(2)   | 108.8(10) |
| Cl(1)-O(1)      | 1.396(11) | O(3)-Cl(1)-O(2)   | 105.0(8)  |
| Cl(1)-O(2)      | 1.389(11) | O(1)-Cl(1)-O(2)   | 112.8(9)  |
| Zn(1)-N(1)      | 2.007(11) | N(1)-Zn(1)-N(1)#1 | 177.9(6)  |
| Zn(1)-O(5)      | 2.058(13) | N(1)-Zn(1)-O(5)   | 91.1(3)   |
| Zn(1)-N(3)      | 2.177(11) | N(1)-Zn(1)-N(3)   | 78.9(5)   |
| N(1)-C(6)       | 1.274(17) | N(1)#1-Zn(1)-N(3) | 100.1(4)  |
| N(1)-C(7)       | 1.364(15) | O(5)-Zn(1)-N(3)   | 118.4(3)  |
| N(2)-C(7)       | 1.368(14) | N(3)-Zn(1)-N(3)#1 | 123.1(6)  |
| N(2)-C(1)       | 1.404(16) | C(6)-N(1)-C(7)    | 108.0(12) |
| N(2)-C(13)      | 1.446(17) | C(6)-N(1)-Zn(1)   | 139.8(11) |
| N(3)-C(8)       | 1.303(15) | C(7)-N(1)-Zn(1)   | 111.3(9)  |
| N(3)-C(12)      | 1.320(15) | C(7)-N(2)-C(1)    | 110.1(11) |
| C(1)-C(2)       | 1.349(19) | C(7)-N(2)-C(13)   | 126.7(11) |
| C(1)-C(6)       | 1.44(2)   | C(1)-N(2)-C(13)   | 123.2(12) |
| C(2)-C(3)       | 1.34(2)   | C(8)-N(3)-C(12)   | 121.3(12) |
| C(3)-C(4)       | 1.33(3)   | C(8)-N(3)-Zn(1)   | 113.1(9)  |
| C(4)-C(5)       | 1.38(2)   | C(12)-N(3)-Zn(1)  | 125.4(9)  |
| C(5)-C(6)       | 1.471(19) | C(2)-C(1)-N(2)    | 136.0(15) |
| C(7)-C(8)       | 1.420(17) | C(2)-C(1)-C(6)    | 123.6(15) |
| C(8)-C(9)       | 1.371(18) | N(2)-C(1)-C(6)    | 100.3(12) |
| C(9)-C(10)      | 1.39(2)   | C(3)-C(2)-C(1)    | 116.2(18) |
| C(10)-C(11)     | 1.40(2)   | C(4)-C(3)-C(2)    | 124(2)    |
| C(11)-C(12)     | 1.43(2)   | C(3)-C(4)-C(5)    | 125.3(18) |
| C(13)-C(18)     | 1.357(19) | C(4)-C(5)-C(6)    | 113.1(15) |
| C(13)-C(14)     | 1.375(18) | N(1)-C(6)-C(1)    | 113.6(14) |
| C(14)-C(15)     | 1.37(2)   | N(1)-C(6)-C(5)    | 128.5(15) |
| C(15)-C(16)     | 1.37(2)   | C(1)-C(6)-C(5)    | 117.7(13) |
| C(16)-C(17)     | 1.33(2)   | N(2)-C(7)-N(1)    | 107.8(11) |
| C(17)-C(18)     | 1.34(2)   | N(2)-C(7)-C(8)    | 129.5(11) |
|                 |           | N(1)-C(7)-C(8)    | 122.5(11) |
| O(4)-Cl(1)-O(3) | 113.2(9)  | N(3)-C(8)-C(9)    | 121.3(13) |
| O(4)-Cl(1)-O(1) | 106.7(6)  | N(3)-C(8)-C(7)    | 113.0(11) |

|                   |           |                   |           |
|-------------------|-----------|-------------------|-----------|
| C(9)-C(8)-C(7)    | 125.7(12) | C(14)-C(13)-N(2)  | 119.0(14) |
| C(8)-C(9)-C(10)   | 119.4(13) | C(13)-C(14)-C(15) | 119.4(15) |
| C(11)-C(10)-C(9)  | 120.6(15) | C(16)-C(15)-C(14) | 119.6(15) |
| C(10)-C(11)-C(12) | 114.4(14) | C(17)-C(16)-C(15) | 118.0(15) |
| N(3)-C(12)-C(11)  | 122.9(12) | C(18)-C(17)-C(16) | 125.0(17) |
| C(18)-C(13)-C(14) | 121.1(13) | C(17)-C(18)-C(13) | 116.6(15) |
| C(18)-C(13)-N(2)  | 119.6(12) |                   |           |

---

Symmetry transformations used to generate equivalent atoms:

#1  $-x+3/2, -y+1/2, z$



Table 4. Anisotropic displacement parameters ( $\text{\AA}^2 \times 10^3$ ) for 2. The anisotropic displacement factor exponent takes the form:  $-2\pi^2 [ h^2 a^{*2} U^{11} + \dots + 2 h k a^* b^* U^{12} ]$

|       | $U^{11}$ | $U^{22}$ | $U^{33}$ | $U^{23}$ | $U^{13}$ | $U^{12}$ |
|-------|----------|----------|----------|----------|----------|----------|
| Cl(1) | 52(2)    | 65(2)    | 70(2)    | -11(2)   | 8(2)     | -14(2)   |
| Zn(1) | 34(1)    | 106(2)   | 71(1)    | 0        | 0        | -10(1)   |
| N(1)  | 50(6)    | 78(8)    | 79(7)    | -13(7)   | 7(6)     | 2(6)     |
| N(2)  | 53(7)    | 58(7)    | 89(8)    | -11(6)   | 4(6)     | 10(6)    |
| N(3)  | 54(7)    | 75(8)    | 79(7)    | -15(6)   | 9(6)     | 9(6)     |
| C(1)  | 69(9)    | 69(10)   | 79(10)   | -20(7)   | -5(7)    | -1(8)    |
| C(2)  | 107(13)  | 83(12)   | 107(12)  | -14(10)  | -8(10)   | 55(11)   |
| C(3)  | 120(18)  | 95(15)   | 180(20)  | -79(15)  | -3(16)   | -2(14)   |
| C(4)  | 142(19)  | 93(15)   | 132(16)  | -53(12)  | -10(14)  | -19(15)  |
| C(5)  | 89(11)   | 40(8)    | 108(11)  | -44(8)   | -19(9)   | 3(8)     |
| C(6)  | 93(12)   | 84(11)   | 48(7)    | -3(7)    | 8(7)     | 17(9)    |
| C(7)  | 42(6)    | 63(8)    | 63(7)    | -16(6)   | 10(5)    | 4(8)     |
| C(8)  | 53(8)    | 53(8)    | 71(8)    | 0(7)     | 1(6)     | -23(7)   |
| C(9)  | 47(8)    | 72(10)   | 123(12)  | -24(9)   | 12(8)    | 3(8)     |
| C(10) | 89(12)   | 102(14)  | 101(12)  | -17(11)  | 2(9)     | -25(11)  |
| C(11) | 79(11)   | 94(13)   | 115(13)  | -23(10)  | 21(10)   | 16(10)   |
| C(12) | 41(7)    | 54(9)    | 118(11)  | -24(8)   | 4(7)     | 6(7)     |
| C(13) | 42(7)    | 114(12)  | 100(11)  | 31(11)   | 3(8)     | -14(9)   |
| C(14) | 55(8)    | 94(11)   | 87(10)   | 24(9)    | 6(8)     | -8(8)    |
| C(15) | 48(9)    | 110(14)  | 161(17)  | 53(13)   | 4(10)    | -12(9)   |
| C(16) | 33(7)    | 77(11)   | 179(18)  | 5(12)    | 8(10)    | -9(8)    |
| C(17) | 89(13)   | 132(16)  | 149(17)  | 44(14)   | -55(12)  | -1(13)   |
| C(18) | 52(8)    | 144(16)  | 85(10)   | -3(10)   | -1(8)    | -41(9)   |
| O(1)  | 138(11)  | 75(8)    | 173(11)  | -37(7)   | 93(9)    | -46(8)   |
| O(2)  | 82(8)    | 165(13)  | 179(12)  | 23(10)   | -64(8)   | -16(8)   |
| O(3)  | 144(11)  | 146(11)  | 102(8)   | 54(8)    | 0(7)     | -52(9)   |
| O(4)  | 86(8)    | 94(8)    | 204(12)  | -69(8)   | 78(8)    | -39(7)   |
| O(5)  | 59(8)    | 132(12)  | 76(8)    | 0        | 0        | -29(9)   |

Table 5. Hydrogen coordinates ( $\times 10^4$ ) and isotropic displacement parameters ( $\text{\AA}^2 \times 10^{-3}$ ) for 2.

|        | x    | y     | z    | U(eq) |
|--------|------|-------|------|-------|
| H(2A)  | 5498 | 5348  | 4352 | 119   |
| H(3A)  | 5852 | 7282  | 4877 | 158   |
| H(4A)  | 6629 | 7482  | 5115 | 147   |
| H(5A)  | 7178 | 5777  | 4797 | 95    |
| H(9A)  | 5972 | 473   | 2866 | 97    |
| H(10A) | 6245 | -1580 | 2261 | 116   |
| H(11A) | 7081 | -2021 | 2197 | 115   |
| H(12A) | 7588 | -282  | 2824 | 85    |
| H(14A) | 5474 | 1624  | 4737 | 94    |
| H(15A) | 4729 | 812   | 4279 | 128   |
| H(16A) | 4389 | 1528  | 2779 | 116   |
| H(17A) | 4834 | 2761  | 1718 | 148   |
| H(18A) | 5603 | 3370  | 2037 | 112   |
| H(5B)  | 7238 | 2847  | 5898 | 107   |
| H(5C)  | 7762 | 2153  | 5898 | 107   |
